# Supplementary material for: Mycobacterium bovis BCG Triggered MyD88 Induces miR-124 Feedback Negatively Regulates Immune Response in Alveolar Epithelial Cells
Source: PubMed Central journal article supplement (PMC3976256; doi:10.1371/journal.pone.0092419), 2014-04-04

## Supplemental figure legends

**Figure S1. miR-124 regulates IFN- $\gamma$  expression.** The expression of IFN- $\gamma$  was detected by qRT-PCR in A549 cells transfected with pcDNA3.1, miR-124 nc, miR-124 mimic or miR-124 inhibitor followed by infected without (A) or with BCG (B). Compared with pcDNA3.1 group \*:  $p < 0.05$ . Data represented the mean  $\pm$  SD from three independent triplicated experiments (N=6).

**Figure S2. miR-124 regulates IL-1 $\alpha$  expression.** The expression of IL-1 $\alpha$  was detected by qRT-PCR in A549 cells transfected with pcDNA3.1, miR-124 nc, miR-124 mimic or miR-124 inhibitor followed by infected without (A) or with BCG (B). Compared with pcDNA3.1 group \*:  $p < 0.05$ . Data represented the mean  $\pm$  SD from three independent triplicated experiments (N=6).

**Figure S3. miR-124 regulates IL-8 expression.** The expression of IL-8 was detected by qRT-PCR in A549 cells transfected with pcDNA3.1, miR-124 nc, miR-124 mimic or miR-124 inhibitor followed by infected without (A) or with BCG (B). Compared with pcDNA3.1 group \*:  $p < 0.05$ . Data represented the mean  $\pm$  SD from three independent triplicated experiments (N=6).

**Figure S4. miR-124 regulates IL-12 $\alpha$  expression.** The expression of IL-12 $\alpha$  was detected by qRT-PCR in A549 cells transfected with pcDNA3.1, miR-124 nc, miR-124 mimic or miR-124 inhibitor followed by infected without (A) or with BCG (B). Compared with pcDNA3.1 group \*:  $p < 0.05$ . Data represented the mean  $\pm$  SD from three independent triplicated experiments (N=6).

| Supplemental table 1                                                                                                        |                                     |                                                                           |            |                                          |
|-----------------------------------------------------------------------------------------------------------------------------|-------------------------------------|---------------------------------------------------------------------------|------------|------------------------------------------|
| Predicted potential binding site (s) of miR-124 in the 3'-UTR of molecules of human TLR signaling pathway and interleukines |                                     |                                                                           |            |                                          |
| Signaling                                                                                                                   | Position of mRNA 3' UTR has-miR-124 | predicted consequential pairing of target region (top) and miRNA (bottom) | seed match | probability of preferential conservation |
| TLR1                                                                                                                        | none                                |                                                                           |            |                                          |
| TLR2                                                                                                                        | none                                |                                                                           |            |                                          |
| TLR3                                                                                                                        | none                                |                                                                           |            |                                          |
| TLR4                                                                                                                        | none                                |                                                                           |            |                                          |
| TLR5                                                                                                                        | none                                |                                                                           |            |                                          |
| TLR6                                                                                                                        | Position 1584-1590                  | 5' ...UCAUGCUGGCCUGUCGCCUUAU...<br>                                       |            | poorly conserved                         |
|                                                                                                                             |                                     | 3' CCGUAAGUGGCGCACGGAAU                                                   | 7mer-1A    |                                          |
| TLR7                                                                                                                        | none                                |                                                                           |            |                                          |
| TLR8                                                                                                                        | none                                |                                                                           |            |                                          |
| TLR9                                                                                                                        | none                                |                                                                           |            |                                          |
| TLR10                                                                                                                       | none                                |                                                                           |            |                                          |
| TLR11                                                                                                                       | unkown                              |                                                                           |            |                                          |
| TLR12                                                                                                                       | unkown                              |                                                                           |            |                                          |
| Myd88                                                                                                                       | Position 916-922                    | 5' ...ACUUGUACCUUGAUUGCCUUA...<br>                                        |            | poorly conserved                         |
|                                                                                                                             | poorly conserved                    | 3' CCGUAAGUGGCGCACGGAAU                                                   | 7mer-1A    |                                          |
| TRAF6                                                                                                                       | Position 42-48 of TRAF6 3' UTR      | 5' ...UACCUGGAGAAAACAGGCCUUU...<br>                                       |            |                                          |
|                                                                                                                             | conserved                           | 3' CCGUAAGUGGCGCACGGAAU                                                   | 7mer-m8    |                                          |
|                                                                                                                             | Position 1674-1680                  | 5' ...UUGUGUCCUCAGCU-GUGCCUUC...<br>                                      |            | poorly conserved                         |
|                                                                                                                             | poorly conserved                    | 3' CCGUAAGUGGCGCACGGAAU                                                   | 7mer-m8    |                                          |
|                                                                                                                             | Position 3849-3855                  | 5' ...ACCUAAACAGUGCAAUGCCUUA...<br>                                       |            |                                          |
|                                                                                                                             | poorly conserved                    | 3' CCGUAAGUGGCGCACGGAAU                                                   | 7mer-1A    |                                          |
| IRAK1                                                                                                                       | none                                |                                                                           |            |                                          |
| IRAK1BP1                                                                                                                    | none                                |                                                                           |            |                                          |
| IRAK2                                                                                                                       | none                                |                                                                           |            |                                          |
| IRAK3                                                                                                                       | Position 179-186                    | 5' ...AAACCCUCAAACAGAGGCCUUA...<br>                                       |            | poorly conserved                         |
|                                                                                                                             | poorly conserved                    | 3' CCGUAAGUGGCG--CACGGAAU                                                 | 8mer       |                                          |
|                                                                                                                             | Position 2779-2785                  | 5' ...AUCCGUGAAAAUCGCUGCCUUA...<br>                                       |            | poorly conserved                         |
|                                                                                                                             | poorly conserved                    | 3' CCGUAAGUGGCGCACGGAAU                                                   | 7mer-1A    |                                          |
| IRAK4                                                                                                                       | none                                |                                                                           |            |                                          |
| IL-1a                                                                                                                       | none                                |                                                                           |            |                                          |
| IL-1B                                                                                                                       | Position 134-140 of IL1B 3' UTR     | 5' ...CAAUGCCCAACUGCCUGCCUUA...<br>                                       |            | poorly conserved                         |
|                                                                                                                             | poorly conserved                    | 3' CCGUAAGUGGCGCACGGAAU                                                   | 7mer-1A    |                                          |
| IL-2                                                                                                                        | none                                |                                                                           |            |                                          |
| IL-3                                                                                                                        | none                                |                                                                           |            |                                          |
| IL-4                                                                                                                        | none                                |                                                                           |            |                                          |
| IL-5                                                                                                                        | none                                |                                                                           |            |                                          |
| IL-6                                                                                                                        | none                                |                                                                           |            |                                          |
| IL-7                                                                                                                        | Position 605-611 of IL7 3' UTR      | 5' ...UGAAUGUGUAACACAGGCCUUC...<br>                                       |            | poorly conserved                         |
|                                                                                                                             | poorly conserved                    | 3' CCGUAAGUGGCGCACGGAAU                                                   | 7mer-m8    |                                          |
| IL-8                                                                                                                        | none                                |                                                                           |            |                                          |
| IL-9                                                                                                                        | none                                |                                                                           |            |                                          |
| IL-10                                                                                                                       | none                                |                                                                           |            |                                          |
| IL-11                                                                                                                       | Position 150-157                    | 5' ...GCCUGGGGGCAUCUGGCCUUA...<br>                                        |            | poorly conserved                         |
|                                                                                                                             | conserved                           | 3' CCGUAAGUGGCGCACGGAAU                                                   | 8mer       |                                          |
| IL-12a                                                                                                                      | none                                |                                                                           |            |                                          |
| IL-12b                                                                                                                      | none                                |                                                                           |            |                                          |
| IL-13                                                                                                                       | none                                |                                                                           |            |                                          |
| IL-15                                                                                                                       | none                                |                                                                           |            |                                          |
| IL-16                                                                                                                       | none                                |                                                                           |            |                                          |
| IL-17a,b,c,d,f                                                                                                              | none                                |                                                                           |            |                                          |
| IL-18                                                                                                                       | none                                |                                                                           |            |                                          |
| IL-19                                                                                                                       | none                                |                                                                           |            |                                          |
| IL-20                                                                                                                       | none                                |                                                                           |            |                                          |
| IL-21                                                                                                                       | none                                |                                                                           |            |                                          |
| IL-23                                                                                                                       | none                                |                                                                           |            |                                          |
| IL-24                                                                                                                       | none                                |                                                                           |            |                                          |
| IL-25                                                                                                                       | none                                |                                                                           |            |                                          |
| IL-26                                                                                                                       | none                                |                                                                           |            |                                          |
| IL-27                                                                                                                       | none                                |                                                                           |            |                                          |
| IL-29                                                                                                                       | none                                |                                                                           |            |                                          |
| IL-31                                                                                                                       | none                                |                                                                           |            |                                          |
| IL-32                                                                                                                       | none                                |                                                                           |            |                                          |
| IL-33                                                                                                                       | none                                |                                                                           |            |                                          |
| IL-34                                                                                                                       | none                                |                                                                           |            |                                          |
| IL-36                                                                                                                       | none                                |                                                                           |            |                                          |
| IL-37                                                                                                                       | none                                |                                                                           |            |                                          |

Ma, et al., 2013  
Figure S1

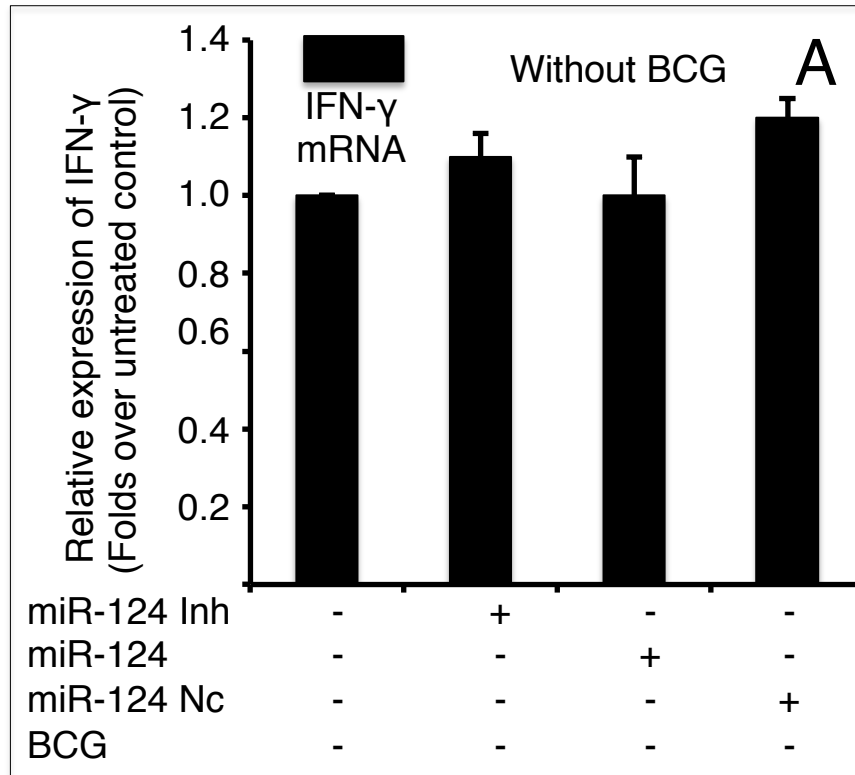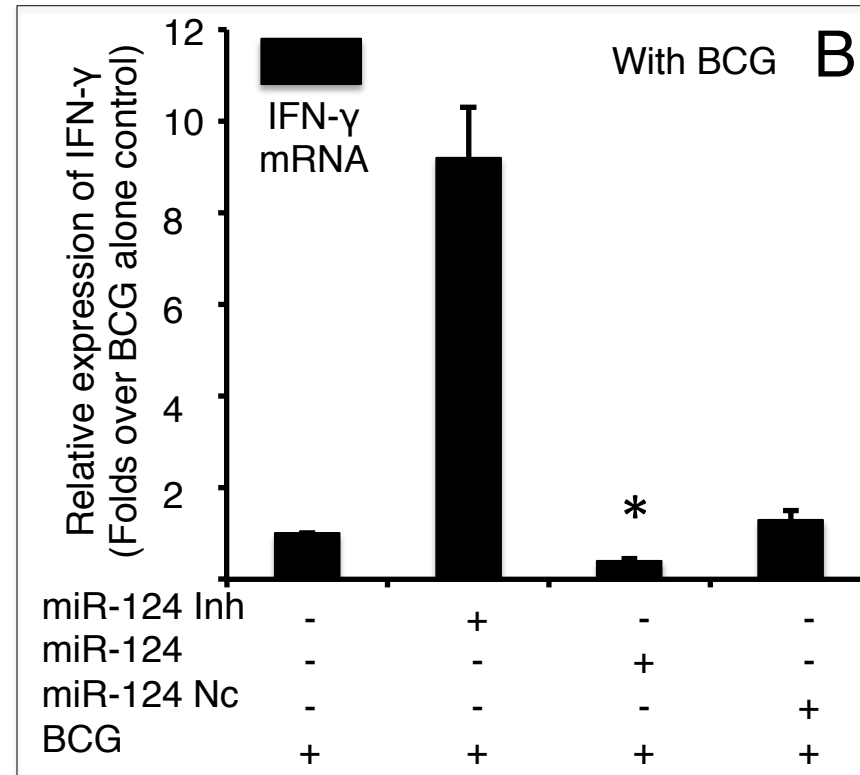

Ma, et al., 2013  
Figure S2

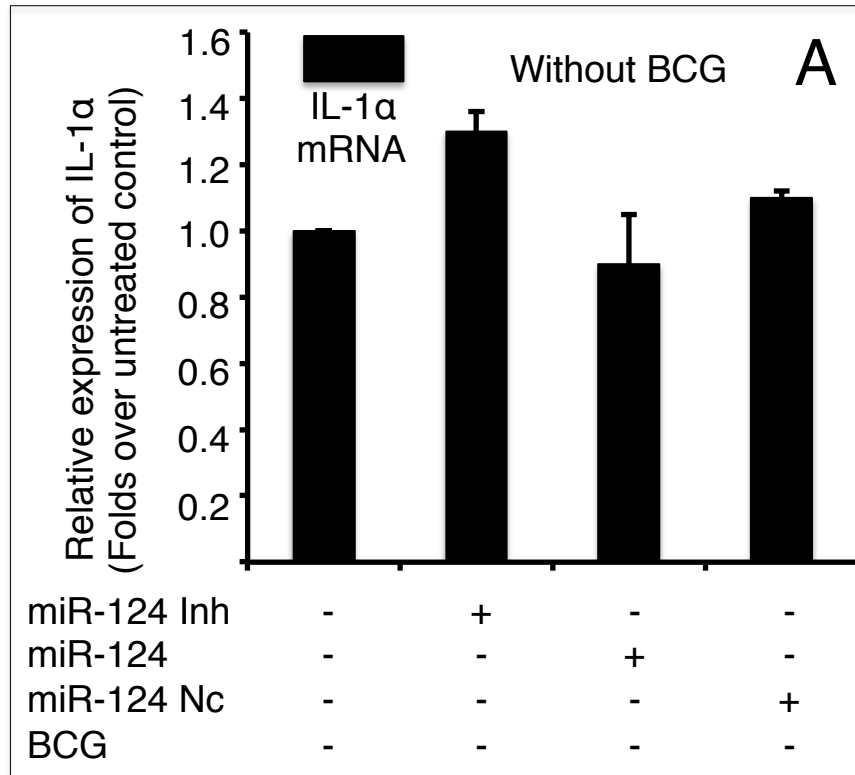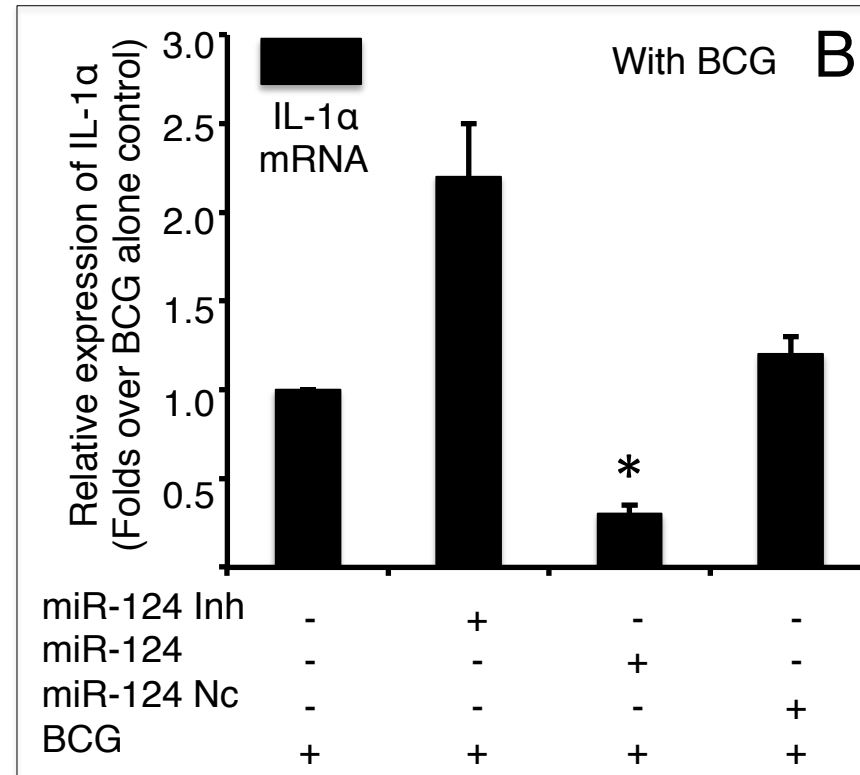

Ma, et al., 2013  
Figure S3

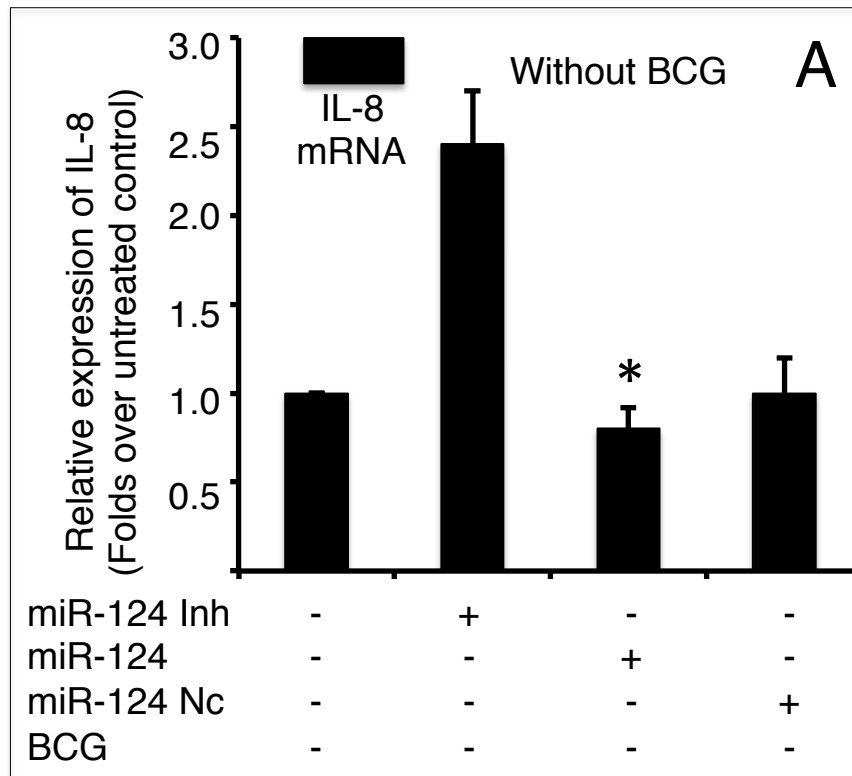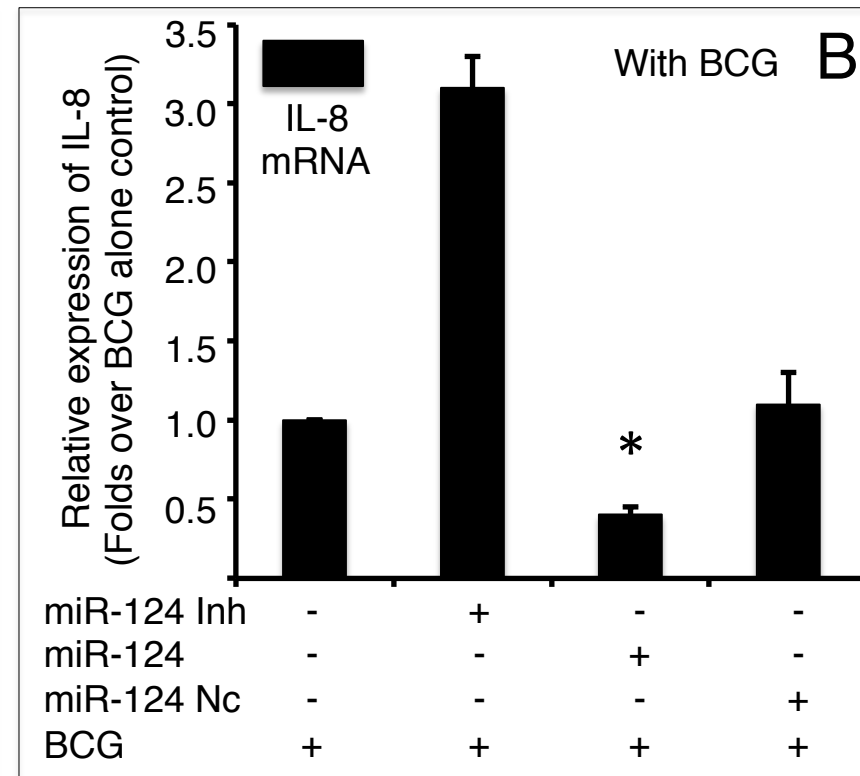

Ma, et al., 2013  
Figure S4

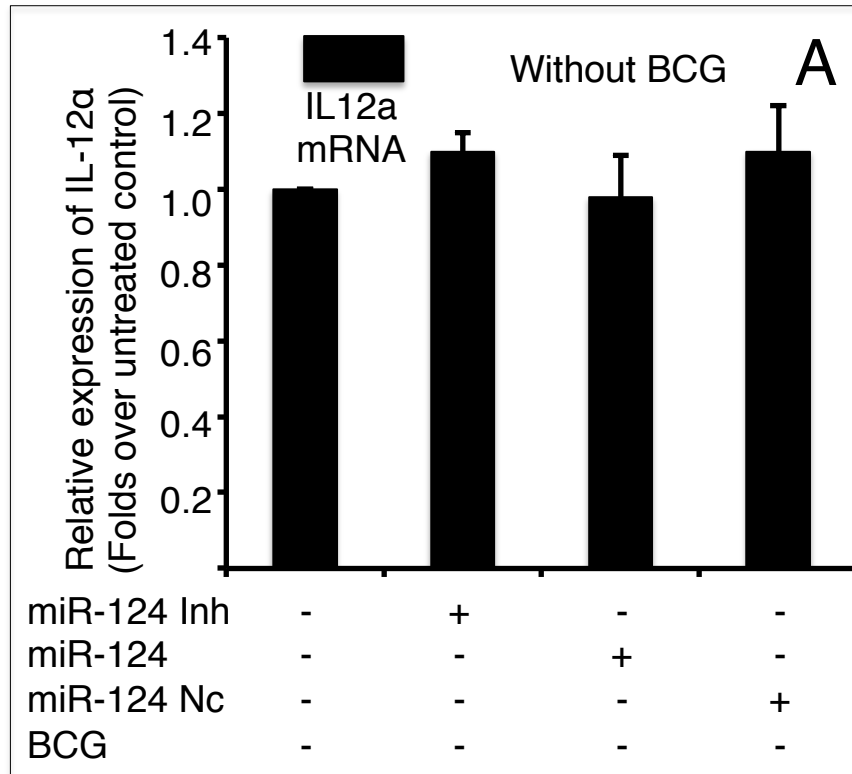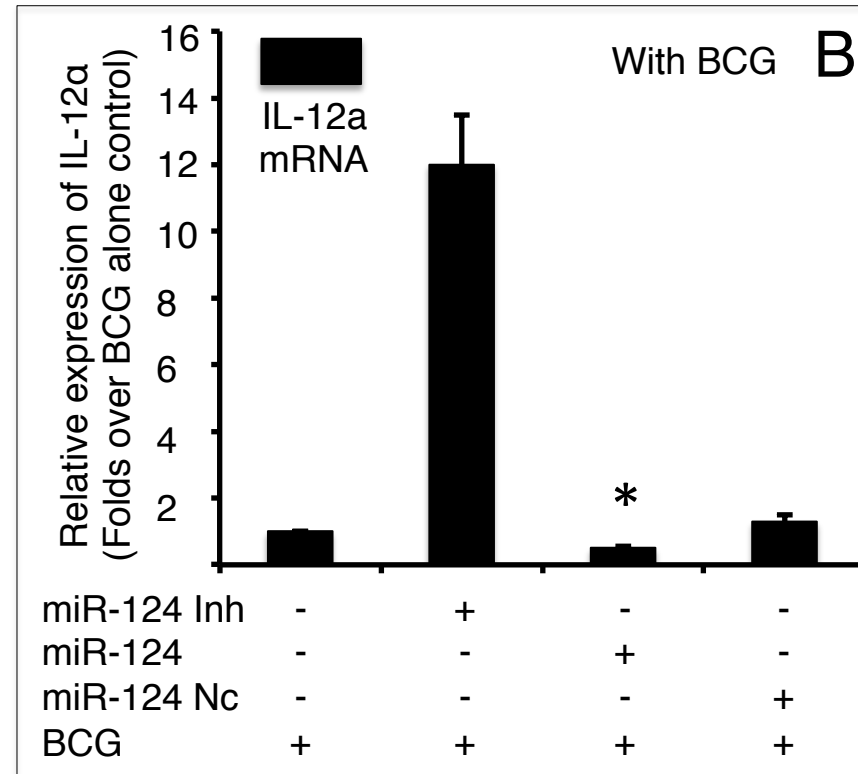

Supplement: pone.0092419.s001.pdf [file pone.0092419.s001.pdf]
